# Supplementary material for: The amount of available food affects diurnal locomotor activity in migratory songbirds during stopover
Source: PubMed Central journal article supplement (PMC6910983; doi:10.1038/s41598-019-55404-3), 2019-12-13
Supplement: 41598_2019_55404_MOESM1_ESM.pdf [file 41598_2019_55404_MOESM1_ESM.pdf]

## Supplementary material – Scientific Reports

### The amount of available food affects diurnal locomotor activity in migratory songbirds during stopover

Andrea Ferretti<sup>1,2\*</sup>, Ivan Maggini<sup>2</sup>, Sara Lupi<sup>2</sup>, Massimiliano Cardinale<sup>3</sup>, Leonida Fusani<sup>1,2</sup>

<sup>1</sup> Department of Cognitive Biology, University of Vienna, Althanstrasse 14, 1090 Vienna, Austria

<sup>2</sup> Konrad-Lorenz Institute of Ethology, University of Veterinary Medicine, Vienna, Savoyenstrasse 1, 1160 Vienna, Austria;

<sup>3</sup> Swedish University of Agricultural Sciences, Department of Aquatic Resources, Marine Research Institute, 45330 Lysekil, Sweden

#### \* Corresponding Author

Andrea FERRETTI

Department of Cognitive Biology, University of Vienna, Althanstrasse 14, 1090 Vienna, Austria

andrea.ferretti1989@gmail.com

ORCID: 0000-0001-5956-3332

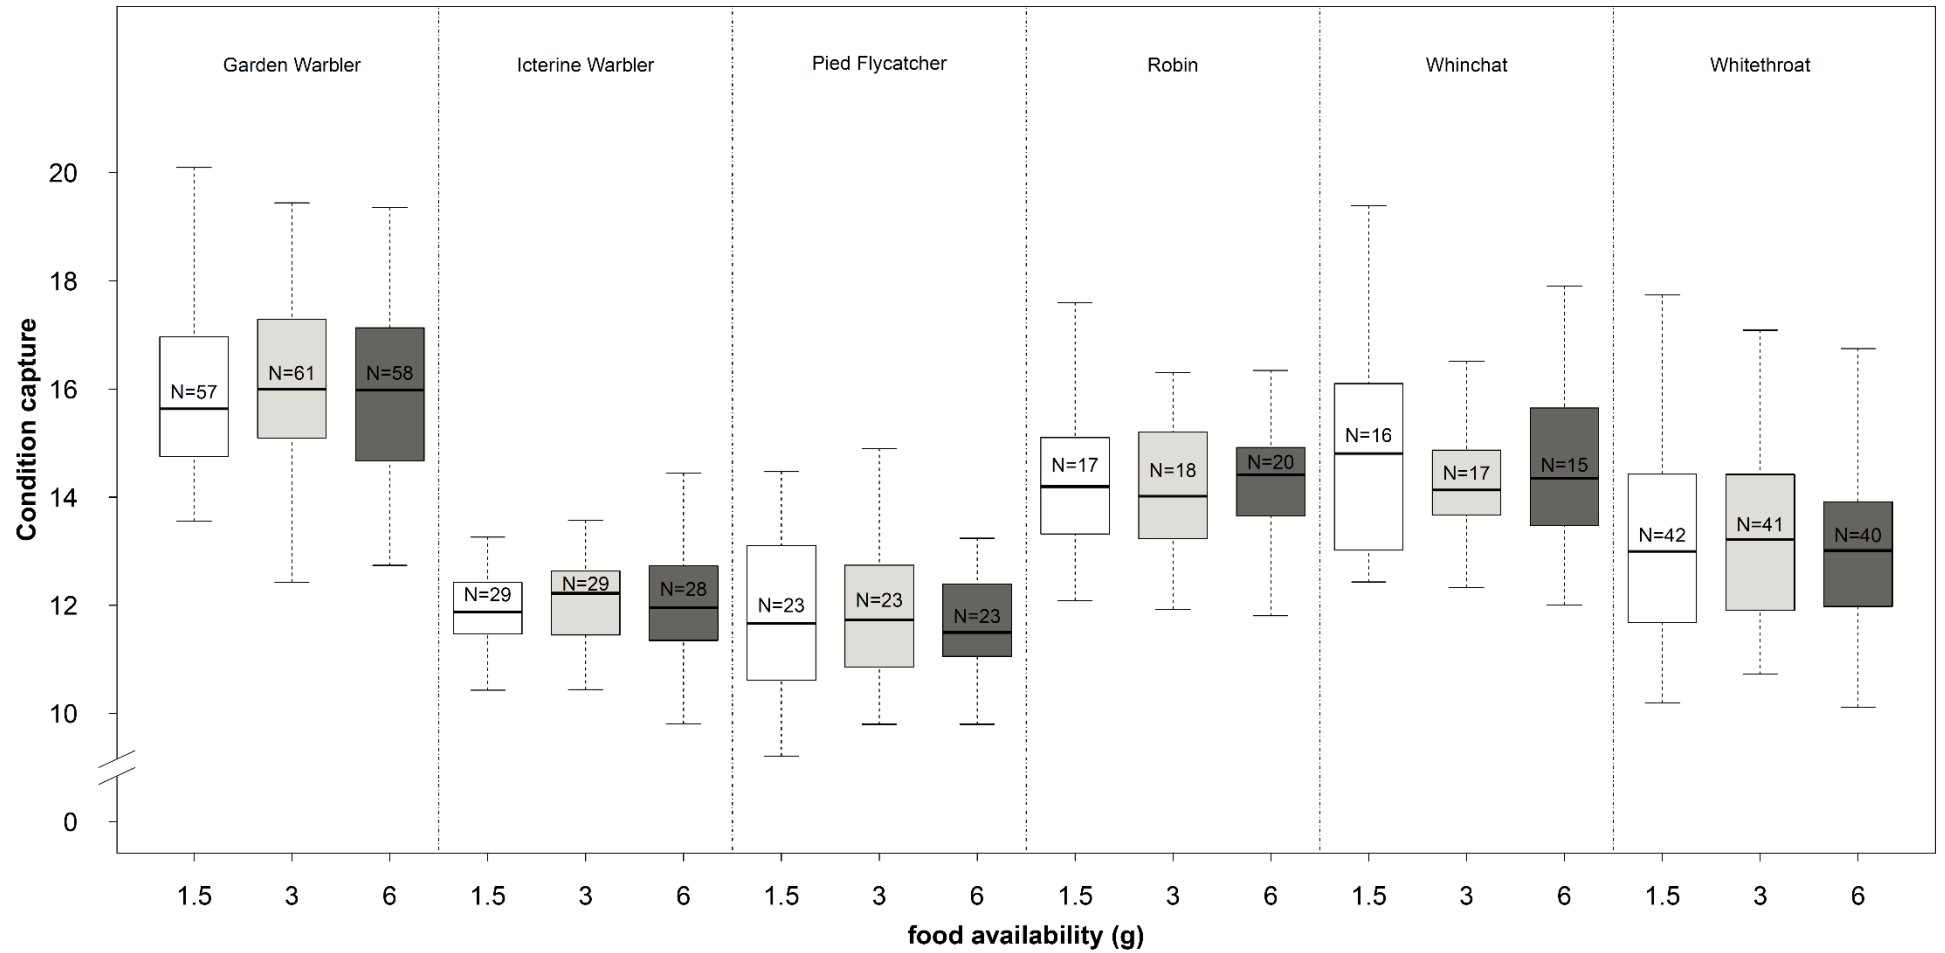

**Fig. S1** Body condition at capture by species and amount of provided food. Condition was estimated by using a Scaled mass index where body mass at capture is scaled by the length of the third primary feather<sup>37</sup>. Icterine Warbler and Pied Flycatcher in our sample had lower body condition at arrival than all other species (Kruskal-Wallis non-parametric ANOVA followed by Kruskal-Dunn post hoc tests;  $p > 0.05$ )

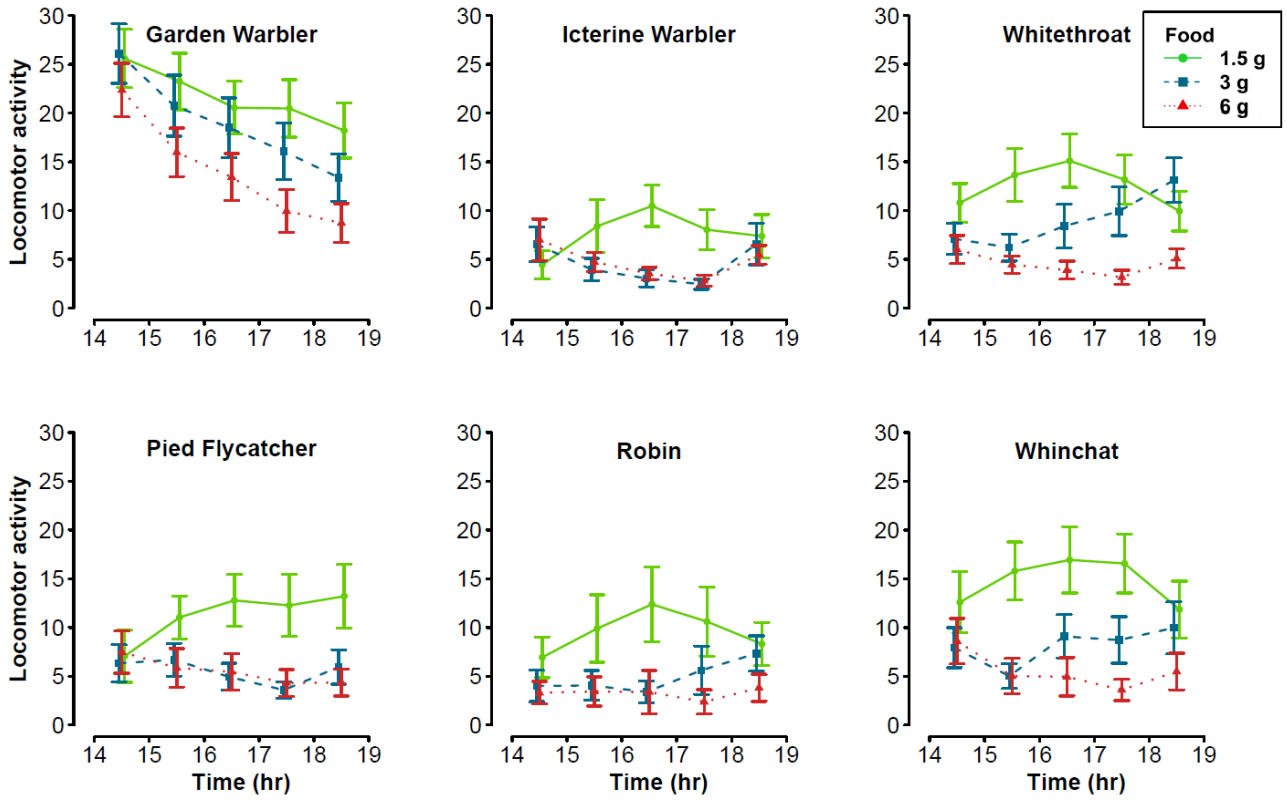

**Fig S2** Activity patterns during daylight hours. Each point represents locomotor activity as the average number of movements ( $\pm$  se) per hour. For the graphical representation, hourly intervals were aligned with the time of civil sunset of the first day of experiments.

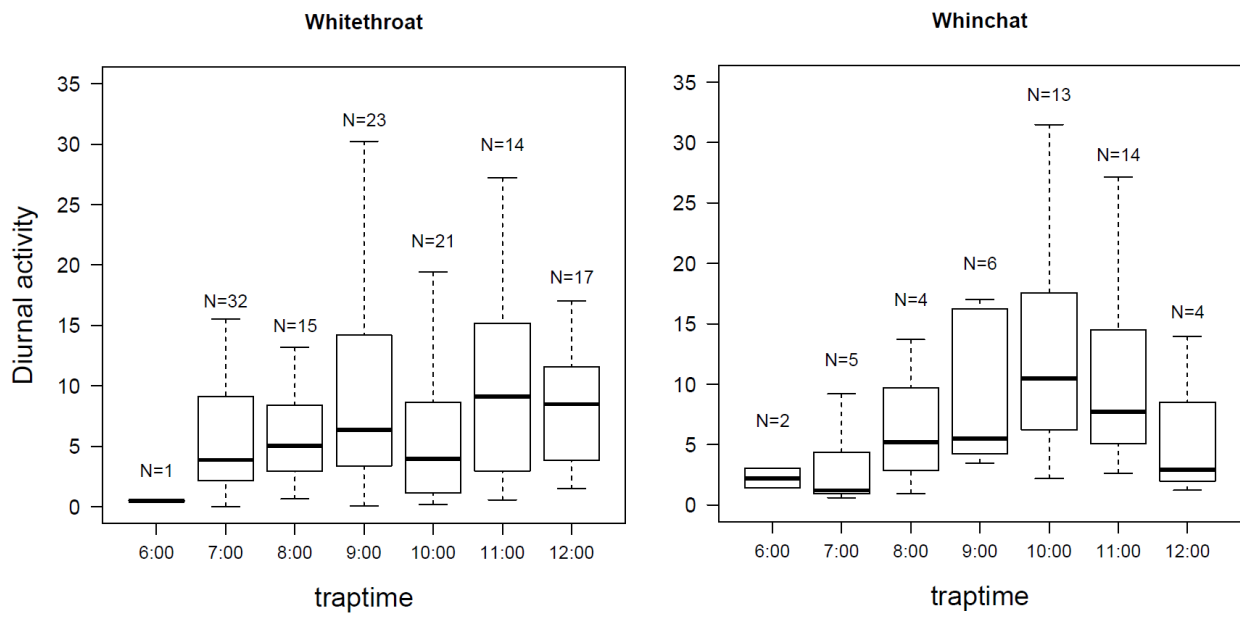

**Fig S3** Diurnal locomotor activity and trap time in Whitethroats and Whinchats. In Whitethroats, the effect of trap time on diurnal activity was due to the single bird caught at 6:00. When we removed this bird from the analysis, the effect disappeared. In Whinchats, the effect of trap time seems to be mainly driven by individuals caught between 6:00 and 7:00.

**Tab. S1** P-values of Linear Mixed Effect Models considering bird ID as random factor. Significant effects are shown in **bold** typeface.

| <i>Activity ~ Food Amount * time+ (1/RING)</i> |                    | Chisq   | p-value        |
|------------------------------------------------|--------------------|---------|----------------|
| Garden Warbler                                 | Food amount        | 3.958   | 0.138          |
|                                                | Time               | 625.967 | < <b>0.001</b> |
|                                                | Food amount * Time | 46.95   | <b>0.014</b>   |
| Icterine Warbler                               | Food amount        | 0.23    | 0.891          |
|                                                | Time               | 81.374  | < <b>0.001</b> |
|                                                | Food amount * Time | 70.665  | < <b>0.001</b> |
| Whitethroat                                    | Food amount        | 11.615  | <b>0.003</b>   |
|                                                | Time               | 354.098 | < <b>0.001</b> |
|                                                | Food amount * Time | 85.722  | < <b>0.001</b> |
| Pied Flycatcher                                | Food amount        | 2.9377  | 0.230          |
|                                                | Time               | 354.098 | < <b>0.001</b> |
|                                                | Food amount * Time | 85.722  | < <b>0.001</b> |
| Robin                                          | Food amount        | 6.2869  | 0.043          |
|                                                | Time               | 62.0065 | < <b>0.001</b> |
|                                                | Food amount * Time | 46.8466 | <b>0.014</b>   |
| Whinchat                                       | Food amount        | 5.3813  | 0.068          |
|                                                | Time               | 202.862 | < <b>0.001</b> |
|                                                | Food Amount * Time | 95.8988 | < <b>0.001</b> |

**Tab. S2** P-values of pairwise post-hoc comparisons for the cases where a significant effect of food treatment on diurnal activity or Zugunruhe 1 was found. Significant differences are shown in bold typeface.

|                  |             | 1.5g vs 3g  | 1.5g vs 6g       | 3g vs 6g    |
|------------------|-------------|-------------|------------------|-------------|
|                  |             | p-value     | p-value          | p-value     |
| Garden Warbler   | Day         | 0.45        | <b>0.02</b>      | > 0.5       |
|                  | Zugunruhe 1 | NA          | NA               | NA          |
|                  | Zugunruhe 2 | NA          | NA               | NA          |
| Whinchat         | Day         | 0.15        | <b>0.02</b>      | > 0.5       |
|                  | Zugunruhe 1 | NA          | NA               | NA          |
|                  | Zugunruhe 2 | NA          | NA               | NA          |
| Whitethroat      | Day         | > 0.5       | <b>0.01</b>      | <b>0.02</b> |
|                  | Zugunruhe 1 | NA          | NA               | NA          |
|                  | Zugunruhe 2 | NA          | NA               | NA          |
| Robin            | Day         | <b>0.04</b> | <b>&lt; 0.01</b> | > 0.5       |
|                  | Zugunruhe 1 | NA          | NA               | NA          |
|                  | Zugunruhe 2 | NA          | NA               | NA          |
| Icterine Warbler | Day         | NA          | NA               | NA          |
|                  | Zugunruhe 1 | <b>0.04</b> | > 0.5            | 0.22        |
|                  | Zugunruhe 2 | NA          | NA               | NA          |

**Tab. S3** P-values of pairwise post-hoc comparisons of Body Condition Change between species. Statistically significant differences are shown in **bold** typeface.

|                  | Garden Warbler | Icterine Warbler | Pied Flycatcher | Robin | Whinchat |
|------------------|----------------|------------------|-----------------|-------|----------|
| Icterine Warbler | < <b>0.001</b> |                  |                 |       |          |
| Pied Flycatcher  | 0.337          | 0.172            |                 |       |          |
| Robin            | 1.000          | <b>0.002</b>     | 1.000           |       |          |
| Whinchat         | 1.000          | < <b>0.001</b>   | 0.182           | 1.000 |          |
| Whitethroat      | <b>0.047</b>   | 0.091            | 1.000           | 1.000 | 0.055    |

**Tab. S4** Lambda ( $\lambda$ ) values used for Box-Cox power transformation

|                  |            | $\lambda$ |
|------------------|------------|-----------|
| Garden Warbler   | Day        | 0.101     |
|                  | Zugunrue 1 | -0.586    |
|                  | Zugunrue 2 | 0.061     |
| Icterine Warbler | Day        | -0.141    |
|                  | Zugunrue 1 | -0.545    |
|                  | Zugunrue 2 | -0.505    |
| Whitethroat      | Day        | 0.020     |
|                  | Zugunrue 1 | -0.869    |
|                  | Zugunrue 2 | 0.101     |
| Pied Flycatcher  | Day        | -0.222    |
|                  | Zugunrue 1 | -0.465    |
|                  | Zugunrue 2 | -0.343    |
| Robin            | Day        | -0.141    |
|                  | Zugunrue 1 | -0.747    |
|                  | Zugunrue 2 | -0.545    |
| Whinchat         | Day        | 0.061     |
|                  | Zugunrue 1 | -0.909    |
|                  | Zugunrue 2 | -0.586    |
